# Supplementary material
Source: PubMed Central journal article supplement (PMC8499858)
Supplement: NIHMS1736891-supplement-1736891_Supp_tab.pdf [file NIHMS1736891-supplement-1736891_Supp_tab.pdf]

**ESM Table 1:** Completion of the Automated Self-Administered 24-h Dietary Recall (ASA24) by trimester and offspring sex

| <b>ASA24s</b>                               | <b>Boys</b> | <b>Girls</b> | <b>P-value</b>    |
|---------------------------------------------|-------------|--------------|-------------------|
| Total completed, % ( <i>n</i> )             |             |              |                   |
| 1 <sup>st</sup> Trimester                   | 55.8 (24)   | 44.2 (19)    | 0.80 <sup>a</sup> |
| 2 <sup>nd</sup> Trimester                   | 52.3 (706)  | 47.7 (644)   |                   |
| 3 <sup>rd</sup> Trimester                   | 51.4 (521)  | 48.6 (493)   |                   |
| Per person frequency, mean (min, max)       |             |              |                   |
| 1 <sup>st</sup> Trimester                   | 3.46 (0, 7) | 3.84 (0, 6)  | 0.51 <sup>b</sup> |
| 2 <sup>nd</sup> Trimester                   | 3.76 (1, 7) | 3.77 (1, 8)  | 0.98 <sup>b</sup> |
| 3 <sup>rd</sup> Trimester                   | 4.38 (1, 7) | 4.37 (1, 8)  | 0.87 <sup>b</sup> |
| Gestational age (wks.) at recall, mean (SD) |             |              |                   |
| 1 <sup>st</sup> Trimester                   | 11.7 (1.6)  | 12.4 (0.7)   | 0.08 <sup>c</sup> |
| 2 <sup>nd</sup> Trimester                   | 20.6 (3.8)  | 20.3 (4.0)   | 0.27 <sup>c</sup> |
| 3 <sup>rd</sup> Trimester                   | 32.8 (4.3)  | 32.9 (3.9)   | 0.76 <sup>c</sup> |

**a** P-value based on chi-square of global sex differences in the distribution of ASA24 frequency by trimester.

**b** P-value based on a general linear models stratified by trimester where frequency of ASA24s per woman was modeled as the dependent variable and offspring sex was the independent variable

**c** P-value based on a general linear models stratified by trimester where gestational age at ASA24s was modeled as the dependent variable and offspring sex was the independent variable

**ESM Table 2.** Maternal characteristics during the prenatal period and mean (SD) concentration of offspring biomarkers at age 4-7 years among 396 boys in the Healthy Start study.

| Maternal characteristics                         | Glucose mmol/l |           |                | HOMA-IR |           |                | Adiponectin |            |                | Leptin µg/l |           |                | TGs:HDL mmol/l Ratio |                 |                | % fat mass |            |                |
|--------------------------------------------------|----------------|-----------|----------------|---------|-----------|----------------|-------------|------------|----------------|-------------|-----------|----------------|----------------------|-----------------|----------------|------------|------------|----------------|
|                                                  | N              | Mean ± SD | P <sup>d</sup> | N       | Mean ± SD | P <sup>d</sup> | N           | Mean ± SD  | P <sup>d</sup> | N           | Mean ± SD | P <sup>d</sup> | N                    | Mean ± SD       | P <sup>d</sup> | N          | Mean ± SD  | P <sup>d</sup> |
| Age at index pregnancy                           |                |           | 0.06           |         |           | <.01           |             |            | 0.88           |             |           | 0.78           |                      |                 | 0.85           |            |            | 0.34           |
| 16-24 y                                          | 62             | 4.7 ± 0.4 |                | 59      | 0.9 ± 0.4 |                | 45          | 10.9 ± 2.9 |                | 45          | 3.8 ± 1.0 |                | 46                   | 0.0034 ± 0.0005 |                | 83         | 19.2 ± 7.9 |                |
| 25-29 y                                          | 66             | 4.6 ± 0.4 |                | 64      | 0.9 ± 0.5 |                | 44          | 10.6 ± 2.3 |                | 50          | 3.8 ± 1.0 |                | 57                   | 0.0034 ± 0.0004 |                | 90         | 20.1 ± 6.8 |                |
| 30-34 y                                          | 94             | 4.6 ± 0.4 |                | 90      | 0.7 ± 0.4 |                | 54          | 10.2 ± 2.5 |                | 45          | 4.0 ± 1.0 |                | 78                   | 0.0035 ± 0.0006 |                | 111        | 20.3 ± 5.4 |                |
| ≥35 y                                            | 50             | 4.6 ± 0.4 |                | 50      | 0.7 ± 0.4 |                | 25          | 11.2 ± 2.0 |                | 27          | 3.7 ± 1.0 |                | 37                   | 0.0034 ± 0.0004 |                | 61         | 20.1 ± 6.6 |                |
| Race-ethnicity                                   |                |           | <.01           |         |           | <.01           |             |            | 0.53           |             |           | 0.58           |                      |                 | 0.67           |            |            | 0.17           |
| Non-Hispanic White                               | 148            | 4.6 ± 0.4 |                | 141     | 0.7 ± 0.3 |                | 86          | 10.7 ± 2.4 |                | 90          | 3.8 ± 1.1 |                | 119                  | 0.0035 ± 0.0005 |                | 200        | 19.9 ± 5.9 |                |
| Non-Hispanic Black                               | 37             | 4.6 ± 0.4 |                | 37      | 0.9 ± 0.4 |                | 30          | 10.7 ± 2.9 |                | 27          | 3.8 ± 0.9 |                | 27                   | 0.0032 ± 0.0004 |                | 48         | 16.8 ± 6.7 |                |
| Hispanic                                         | 73             | 4.8 ± 0.3 |                | 71      | 0.9 ± 0.5 |                | 43          | 10.4 ± 2.5 |                | 41          | 4.0 ± 0.9 |                | 57                   | 0.0035 ± 0.0005 |                | 76         | 22.4 ± 7.7 |                |
| Non-Hispanic Other <sup>a</sup>                  | 14             | 4.7 ± 0.4 |                | 14      | 0.9 ± 0.4 |                | 9           | 10.7 ± 2.4 |                | 9           | 3.6 ± 1.2 |                | 15                   | 0.0033 ± 0.0005 |                | 21         | 19.0 ± 5.9 |                |
| Education                                        |                |           | <.01           |         |           | <.01           |             |            | 0.94           |             |           | 0.94           |                      |                 | 0.11           |            |            | 0.66           |
| High school or less                              | 66             | 4.8 ± 0.3 |                | 62      | 0.9 ± 0.5 |                | 56          | 10.7 ± 2.7 |                | 38          | 3.8 ± 1.0 |                | 57                   | 0.0035 ± 0.0005 |                | 84         | 20.3 ± 8.2 |                |
| Some college /associates degree                  | 66             | 4.7 ± 0.4 |                | 65      | 0.9 ± 0.5 |                | 38          | 10.5 ± 2.6 |                | 50          | 3.9 ± 1.0 |                | 55                   | 0.0034 ± 0.0005 |                | 79         | 19.6 ± 6.7 |                |
| College graduate                                 | 59             | 4.5 ± 0.4 |                | 57      | 0.7 ± 0.4 |                | 22          | 10.2 ± 2.1 |                | 38          | 3.7 ± 1.0 |                | 46                   | 0.0033 ± 0.0004 |                | 80         | 20.1 ± 5.9 |                |
| Graduate degree                                  | 81             | 4.5 ± 0.4 |                | 79      | 0.7 ± 0.3 |                | 52          | 10.8 ± 2.4 |                | 41          | 3.9 ± 1.1 |                | 60                   | 0.0035 ± 0.0005 |                | 102        | 19.7 ± 5.6 |                |
| Pre-pregnancy BMI kg/m <sup>2</sup> <sup>b</sup> |                |           | 0.02           |         |           | 0.03           |             |            | 0.94           |             |           | 0.78           |                      |                 | 0.37           |            |            | <.01           |
| Underweight (<19.0)                              | 6              | 4.7 ± 0.2 |                | 5       | 0.8 ± 0.3 |                | 2           | 11.0 ± 1.5 |                | 4           | 5.1 ± 0.7 |                | 3                    | 0.0033 ± 0.0006 |                | 8          | 18.6 ± 6.6 |                |
| Normal (19.0-24.9)                               | 130            | 4.6 ± 0.4 |                | 124     | 0.7 ± 0.4 |                | 78          | 10.7 ± 2.5 |                | 83          | 3.8 ± 1.0 |                | 104                  | 0.0034 ± 0.0005 |                | 165        | 18.8 ± 6.2 |                |
| Overweight (25.0-29.9)                           | 75             | 4.7 ± 0.4 |                | 74      | 0.8 ± 0.5 |                | 48          | 10.4 ± 2.5 |                | 46          | 3.8 ± 1.0 |                | 55                   | 0.0035 ± 0.0005 |                | 100        | 20.4 ± 6.2 |                |
| Obese (≥30.0)                                    | 61             | 4.7 ± 0.4 |                | 60      | 0.9 ± 0.4 |                | 40          | 10.8 ± 2.6 |                | 34          | 3.9 ± 1.1 |                | 56                   | 0.0034 ± 0.0005 |                | 72         | 22.0 ± 7.8 |                |
| Gestational weight gain <sup>c</sup>             |                |           | 0.96           |         |           | 0.61           |             |            | 0.54           |             |           | 0.33           |                      |                 | 0.17           |            |            | 0.58           |
| Inadequate                                       | 37             | 4.6 ± 0.3 |                | 35      | 0.7 ± 0.4 |                | 21          | 10.7 ± 2.3 |                | 19          | 3.9 ± 1.0 |                | 29                   | 0.0036 ± 0.0005 |                | 54         | 19.5 ± 7.7 |                |
| Adequate                                         | 35             | 4.7 ± 0.3 |                | 33      | 0.9 ± 0.4 |                | 19          | 11.0 ± 2.3 |                | 20          | 4.2 ± 1.0 |                | 31                   | 0.0034 ± 0.0005 |                | 47         | 20.2 ± 7.3 |                |
| Excessive                                        | 174            | 4.6 ± 0.4 |                | 170     | 0.8 ± 0.4 |                | 112         | 10.5 ± 2.6 |                | 117         | 3.7 ± 1.0 |                | 136                  | 0.0034 ± 0.0005 |                | 212        | 20.1 ± 5.8 |                |
| Gestational diabetes mellitus                    |                |           | 0.25           |         |           | 0.86           |             |            | 0.15           |             |           | 0.06           |                      |                 | 0.52           |            |            | 0.02           |
| No                                               | 248            | 4.6 ± 0.4 |                | 240     | 0.8 ± 0.4 |                | 152         | 10.6 ± 2.5 |                | 151         | 3.8 ± 1.0 |                | 199                  | 0.0034 ± 0.0005 |                | 308        | 19.6 ± 6.4 |                |
| Yes                                              | 11             | 4.8 ± 0.3 |                | 11      | 0.8 ± 0.3 |                | 9           | 9.4 ± 3.1  |                | 5           | 4.7 ± 1.0 |                | 8                    | 0.0035 ± 0.0005 |                | 14         | 23.9 ± 6.3 |                |
| Smoking during pregnancy                         |                |           | 0.49           |         |           | 0.88           |             |            | 0.98           |             |           | 0.48           |                      |                 | 0.66           |            |            | 0.31           |
| No                                               | 259            | 4.6 ± 0.4 |                | 250     | 0.8 ± 0.4 |                | 157         | 10.6 ± 2.5 |                | 155         | 3.8 ± 1.0 |                | 207                  | 0.0034 ± 0.0005 |                | 327        | 20.0 ± 6.7 |                |
| Yes                                              | 13             | 4.6 ± 0.4 |                | 13      | 0.8 ± 0.5 |                | 11          | 10.6 ± 3.2 |                | 12          | 4.0 ± 0.9 |                | 11                   | 0.0034 ± 0.0005 |                | 18         | 18.4 ± 6.3 |                |
| Physical activity status (moderate-to-vigorous)  |                |           | 0.29           |         |           | 0.93           |             |            | 0.65           |             |           | 0.61           |                      |                 | 0.24           |            |            | 0.73           |
| <150 min/week                                    | 109            | 4.6 ± 0.3 |                | 107     | 0.8 ± 0.4 |                | 69          | 10.5 ± 2.3 |                | 63          | 3.9 ± 1.0 |                | 84                   | 0.0035 ± 0.0005 |                | 138        | 19.8 ± 6.8 |                |
| ≥150 min/week                                    | 163            | 4.6 ± 0.4 |                | 156     | 0.8 ± 0.4 |                | 99          | 10.7 ± 2.6 |                | 104         | 3.8 ± 1.0 |                | 134                  | 0.0034 ± 0.0005 |                | 207        | 20.0 ± 6.6 |                |

Abbreviations: HOMA-IR, Homeostatic Model Assessment of Insulin Resistance; HDL, high-density lipoprotein; TGs, Triglycerides; BMI, body mass index. Bolded values indicate P<0.05.

Sample sizes for covariates used in multivariable models are, Model 1: maternal race/ethnicity (N=396), age (N=396), education (N=396), maternal smoking habits (N=396), physical activity (N=396), avg. gestational week at diet recall (N=396); child's age (N=396), Model 2: Model 1 covariates + maternal pre-pregnancy BMI (N=396); Model 3: Model 1 covariates + child's Health Eating Index score (N=334), and physical activity levels (N=310)

a Other includes, Asian, American Indian/Alaska natives, Hawaiian/Pacific Islanders

b Division of Nutrition, Physical Activity, and Obesity, National Center for Chronic Disease Prevention and Health Promotion

c Institute of Medicine 2009 guidelines

d tests for significant differences between mean maternal HEI score and maternal characteristics in the entire sample and stratified by offspring sex were based on generalized linear models; P-value represents Type III main effects for categorical variables. For ordinal variables (age, education level, pre-pregnancy weight status, gestational weight gain status, and birthweight categories) the P-value represents a test for linear trend.

**ESM Table 3.** Maternal characteristics during the prenatal period and mean (SD) concentration of offspring biomarkers at age 4-7 years among 365 girls in the Healthy Start study.

| Maternal characteristics                        | Glucose mmol/l |           |                | HOMA-IR |           |                | Adiponectin |            |                | Leptin µg/l |           |                | TGs:HDL mmol/l Ratio |                 |                | % fat mass |            |                |
|-------------------------------------------------|----------------|-----------|----------------|---------|-----------|----------------|-------------|------------|----------------|-------------|-----------|----------------|----------------------|-----------------|----------------|------------|------------|----------------|
|                                                 | N              | Mean ± SD | P <sup>d</sup> | N       | Mean ± SD | P <sup>d</sup> | N           | Mean ± SD  | P <sup>d</sup> | N           | Mean ± SD | P <sup>d</sup> | N                    | Mean ± SD       | P <sup>d</sup> | N          | Mean ± SD  | P <sup>d</sup> |
| Age at index pregnancy                          |                |           | <b>0.03</b>    |         |           | <b>0.01</b>    |             |            | 0.73           |             |           | 0.89           |                      |                 | 0.98           |            |            | <b>&lt;.01</b> |
| 16-24 y                                         | 76             | 4.6 ± 0.3 |                | 71      | 0.9 ± 0.4 |                | 39          | 10.9 ± 2.5 |                | 71          | 6.7 ± 2.1 |                | 59                   | 0.0035 ± 0.0005 |                | 106        | 20.6 ± 7.1 |                |
| 25-29 y                                         | 61             | 4.5 ± 0.3 |                | 57      | 0.9 ± 0.4 |                | 27          | 11.0 ± 2.7 |                | 49          | 7.0 ± 2.1 |                | 48                   | 0.0035 ± 0.0005 |                | 90         | 19.9 ± 7.4 |                |
| 30-34 y                                         | 63             | 4.4 ± 0.3 |                | 58      | 0.7 ± 0.2 |                | 37          | 11.2 ± 2.6 |                | 49          | 6.5 ± 1.6 |                | 51                   | 0.0036 ± 0.0005 |                | 86         | 19.7 ± 6.3 |                |
| ≥35 y                                           | 31             | 4.5 ± 0.4 |                | 29      | 0.8 ± 0.3 |                | 16          | 11.0 ± 2.0 |                | 27          | 6.8 ± 1.9 |                | 23                   | 0.0035 ± 0.0006 |                | 53         | 17.4 ± 6.0 |                |
| Race-ethnicity                                  |                |           | <b>0.88</b>    |         |           | <b>0.01</b>    |             |            | 0.46           |             |           | <b>0.06</b>    |                      | 0.93            |                |            |            | <b>0.88</b>    |
| Non-Hispanic White                              | 127            | 4.4 ± 0.3 |                | 120     | 0.7 ± 0.3 |                | 61          | 11.0 ± 2.6 |                | 107         | 6.5 ± 1.8 |                | 99                   | 0.0036 ± 0.0005 |                | 187        | 20.0 ± 6.8 |                |
| Non-Hispanic Black                              | 41             | 4.5 ± 0.3 |                | 38      | 0.9 ± 0.4 |                | 25          | 10.4 ± 2.7 |                | 36          | 6.9 ± 2.1 |                | 31                   | 0.0035 ± 0.0004 |                | 50         | 16.9 ± 6.7 |                |
| Hispanic                                        | 55             | 4.7 ± 0.3 |                | 49      | 0.9 ± 0.5 |                | 30          | 11.8 ± 2.0 |                | 46          | 7.3 ± 2.1 |                | 44                   | 0.0036 ± 0.0006 |                | 79         | 21.2 ± 6.7 |                |
| Non-Hispanic Other <sup>a</sup>                 | 8              | 4.5 ± 0.2 |                | 8       | 0.7 ± 0.3 |                | 3           | 9.8 ± 1.5  |                | 7           | 6.3 ± 1.2 |                | 7                    | 0.0033 ± 0.0004 |                | 19         | 17.5 ± 7.0 |                |
| Education                                       |                |           | <b>&lt;.01</b> |         |           | <b>&lt;.01</b> |             |            | 0.79           |             |           | 0.49           |                      | 0.25            |                |            |            | <b>0.10</b>    |
| High school or less                             | 81             | 4.6 ± 0.3 |                | 76      | 0.9 ± 0.4 |                | 46          | 11.0 ± 2.5 |                | 67          | 7.0 ± 2.1 |                | 60                   | 0.0035 ± 0.0004 |                | 112        | 20.7 ± 7.0 |                |
| Some college /associates degree                 | 53             | 4.5 ± 0.3 |                | 50      | 0.8 ± 0.5 |                | 26          | 11.2 ± 2.0 |                | 45          | 6.4 ± 1.8 |                | 49                   | 0.0036 ± 0.0005 |                | 77         | 19.8 ± 6.6 |                |
| College graduate                                | 50             | 4.4 ± 0.3 |                | 45      | 0.7 ± 0.3 |                | 24          | 11.5 ± 2.6 |                | 44          | 6.6 ± 1.9 |                | 35                   | 0.0036 ± 0.0006 |                | 70         | 18.0 ± 6.7 |                |
| Graduate degree                                 | 47             | 4.4 ± 0.4 |                | 44      | 0.7 ± 0.2 |                | 23          | 10.6 ± 2.9 |                | 40          | 6.8 ± 1.7 |                | 37                   | 0.0036 ± 0.0006 |                | 76         | 19.6 ± 7.0 |                |
| Pre-pregnancy BMI kg/m <sup>2</sup>             |                |           | <b>&lt;.01</b> |         |           | 0.54           |             |            | 0.48           |             |           | 0.16           |                      | 0.57            |                |            |            | <b>0.16</b>    |
| Underweight (<19.0)                             | 5              | 4.6 ± 0.2 |                | 5       | 1.0 ± 0.6 |                | 0           | -          |                | 5           | 6.7 ± 2.1 |                | 5                    | 0.0037 ± 0.0004 |                | 173        | 20.4 ± 8.7 |                |
| Normal (19.0-24.9)                              | 116            | 4.4 ± 0.3 |                | 108     | 0.7 ± 0.3 |                | 61          | 10.7 ± 2.7 |                | 106         | 6.6 ± 2.0 |                | 86                   | 0.0036 ± 0.0005 |                | 88         | 18.9 ± 7.2 |                |
| Overweight (25.0-29.9)                          | 62             | 4.6 ± 0.3 |                | 58      | 0.9 ± 0.4 |                | 31          | 11.7 ± 1.9 |                | 47          | 6.7 ± 1.8 |                | 51                   | 0.0036 ± 0.0005 |                | 65         | 20.7 ± 6.5 |                |
| Obese (≥30.0)                                   | 48             | 4.6 ± 0.4 |                | 44      | 0.8 ± 0.4 |                | 27          | 10.9 ± 2.6 |                | 38          | 7.2 ± 2.0 |                | 39                   | 0.0035 ± 0.0005 |                | 62         | 20.1 ± 6.0 |                |
| Gestational weight gain <sup>b</sup>            |                |           | <b>0.30</b>    |         |           | <b>0.69</b>    |             |            | 0.19           |             |           | <b>0.94</b>    |                      | <b>0.99</b>     |                |            |            | <b>0.13</b>    |
| Inadequate                                      | 44             | 4.5 ± 0.4 |                | 37      | 0.8 ± 0.4 |                | 23          | 10.6 ± 2.4 |                | 37          | 6.8 ± 2.2 |                | 34                   | 0.0035 ± 0.0005 |                | 62         | 19.0 ± 7.9 |                |
| Adequate                                        | 25             | 4.4 ± 0.4 |                | 23      | 0.8 ± 0.4 |                | 11          | 10.6 ± 2.6 |                | 26          | 6.3 ± 1.7 |                | 21                   | 0.0035 ± 0.0005 |                | 42         | 18.4 ± 7.5 |                |
| Excessive                                       | 152            | 4.5 ± 0.3 |                | 146     | 0.8 ± 0.4 |                | 76          | 11.3 ± 2.5 |                | 120         | 6.7 ± 1.9 |                | 114                  | 0.0036 ± 0.0005 |                | 206        | 20.2 ± 6.4 |                |
| Gestational diabetes mellitus                   |                |           | <b>0.21</b>    |         |           | <b>0.97</b>    |             |            | 0.32           |             |           | <b>0.84</b>    |                      | <b>0.81</b>     |                |            |            | <b>0.21</b>    |
| No                                              | 208            | 4.5 ± 0.3 |                | 193     | 0.8 ± 0.4 |                | 110         | 11.0 ± 2.5 |                | 180         | 6.7 ± 1.9 |                | 159                  | 0.0035 ± 0.0005 |                | 299        | 19.9 ± 6.8 |                |
| Yes                                             | 9              | 4.6 ± 0.3 |                | 8       | 0.8 ± 0.2 |                | 3           | 12.5 ± 1.4 |                | 8           | 6.8 ± 2.0 |                | 10                   | 0.0035 ± 0.0005 |                | 17         | 17.8 ± 8.2 |                |
| Smoking during pregnancy                        |                |           | <b>0.21</b>    |         |           | <b>0.08</b>    |             |            | 0.29           |             |           | <b>0.54</b>    |                      | <b>0.47</b>     |                |            |            | <b>0.15</b>    |
| No                                              | 211            | 4.5 ± 0.3 |                | 196     | 0.8 ± 0.4 |                | 104         | 11.1 ± 2.5 |                | 183         | 6.7 ± 1.9 |                | 168                  | 0.0035 ± 0.0005 |                | 311        | 19.5 ± 6.8 |                |
| Yes                                             | 20             | 4.6 ± 0.3 |                | 19      | 0.9 ± 0.4 |                | 15          | 10.4 ± 2.6 |                | 13          | 6.4 ± 1.9 |                | 13                   | 0.0036 ± 0.0004 |                | 24         | 21.6 ± 8.1 |                |
| Physical activity status (moderate-to-vigorous) |                |           | <b>0.11</b>    |         |           | <b>0.84</b>    |             |            | 0.51           |             |           | <b>0.86</b>    |                      | <b>0.23</b>     |                |            |            | <b>0.91</b>    |
| <150 min/week                                   | 93             | 4.6 ± 0.3 |                | 85      | 0.8 ± 0.3 |                | 49          | 10.9 ± 2.7 |                | 77          | 6.8 ± 1.8 |                | 69                   | 0.0036 ± 0.0006 |                | 130        | 19.7 ± 6.6 |                |
| ≥150 min/week                                   | 138            | 4.5 ± 0.3 |                | 130     | 0.8 ± 0.4 |                | 70          | 11.2 ± 2.3 |                | 119         | 6.7 ± 2.0 |                | 112                  | 0.0035 ± 0.0005 |                | 205        | 19.6 ± 7.0 |                |

Abbreviations: HOMA-IR, Homeostatic Model Assessment of Insulin Resistance; HDL, high-density lipoprotein; TGs, Triglycerides; BMI, body mass index. Bolded values indicate P<0.05.

Sample sizes for covariates used in multivariable models are, Model 1: maternal race/ethnicity (N=365), age (N=365), education (N=365), maternal smoking habits (n=365), physical activity (N=365), avg. gestational week at diet recall (N=365); child's age (N=365), Model 2: Model 1 covariates + maternal pre-pregnancy BMI (N=365); Model 3: Model 1 covariates + child's Health Eating Index score (N=294), and physical activity levels (N=282)

a Other includes, Asian, American Indian/Alaska natives, Hawaiian/Pacific Islanders

b Division of Nutrition, Physical Activity, and Obesity, National Center for Chronic Disease Prevention and Health Promotion

c Institute of Medicine 2009 guidelines

d tests for significant differences between mean maternal HEI score and maternal characteristics in the entire sample and stratified by offspring sex were based on generalized linear models; P-value represents Type III main effects for categorical variables. For ordinal variables (age, education level, pre-pregnancy weight status, gestational weight gain status, and birthweight categories) the P-value represents a test for linear trend.

**ESM Table 4.** Association of maternal Health Eating Index (HEI) score (continuous and quintiles) during pregnancy and childhood biomarkers of glucose homeostasis, the adipoinular axis, lipids, and body composition among boys (N=396).

| HEI score                          | MODEL 1<br>(GA at diet recall) |       | MODEL 2<br>(confounders) |       |
|------------------------------------|--------------------------------|-------|--------------------------|-------|
|                                    | BETA CI                        | P     | BETA CI                  | P     |
| Glucose, mmol/l                    |                                |       |                          |       |
| continuous                         | -0.004 (-0.007, 0.000)         | 0.03  | -0.003 (-0.006, 0.001)   | 0.12  |
| quintile 5                         | -0.13 (-0.27, 0.01)            | 0.02  | -0.10 (-0.25, 0.04)      | 0.10  |
| quintile 4                         | -0.20 (-0.33, -0.06)           |       | -0.18 (-0.32, -0.04)     |       |
| quintile 3                         | -0.03 (-0.17, 0.11)            |       | -0.02 (-0.16, 0.12)      |       |
| quintile 2                         | -0.10 (-0.24, 0.04)            |       | -0.10 (-0.23, 0.03)      |       |
| quintile 1                         | ref                            |       | ref                      |       |
| Insulin, pmol/l <sup>a</sup>       |                                |       |                          |       |
| continuous                         | -0.006 (-0.010, -0.001)        | 0.01  | -0.004 (-0.009, 0.001)   | 0.08  |
| quintile 5                         | -0.24 (-0.42, -0.06)           | <0.01 | -0.20 (-0.40, 0.00)      | 0.02  |
| quintile 4                         | -0.24 (-0.41, -0.06)           |       | -0.20 (-0.39, -0.02)     |       |
| quintile 3                         | -0.16 (-0.34, 0.03)            |       | -0.15 (-0.34, 0.05)      |       |
| quintile 2                         | -0.07 (-0.26, 0.11)            |       | -0.08 (-0.26, 0.11)      |       |
| quintile 1                         | ref                            |       | ref                      |       |
| One/insulin, pmol/l <sup>a</sup>   |                                |       |                          |       |
| continuous                         | 0.006 (0.001, 0.010)           | 0.01  | 0.004 (-0.001, 0.009)    | 0.08  |
| quintile 5                         | 0.24 (0.06, 0.42)              | <0.01 | 0.20 (0.00, 0.40)        | 0.02  |
| quintile 4                         | 0.24 (0.06, 0.41)              |       | 0.20 (0.02, 0.39)        |       |
| quintile 3                         | 0.16 (-0.03, 0.34)             |       | 0.15 (-0.05, 0.34)       |       |
| quintile 2                         | 0.07 (-0.11, 0.26)             |       | 0.08 (-0.11, 0.26)       |       |
| quintile 1                         | ref                            |       | ref                      |       |
| HOMA-IR, % <sup>a</sup>            |                                |       |                          |       |
| continuous                         | -0.006 (-0.011, -0.002)        | 0.01  | -0.005 (-0.009, 0.000)   | 0.07  |
| quintile 5                         | -0.27 (-0.46, -0.08)           | <0.01 | -0.23 (-0.43, -0.02)     | 0.02  |
| quintile 4                         | -0.28 (-0.46, -0.09)           |       | -0.23 (-0.43, -0.03)     |       |
| quintile 3                         | -0.18 (-0.37, 0.01)            |       | -0.16 (-0.36, 0.03)      |       |
| quintile 2                         | -0.13 (-0.31, 0.06)            |       | -0.12 (-0.31, 0.07)      |       |
| quintile 1                         | ref                            |       | ref                      |       |
| Adiponectin, ug/ml <sup>a</sup>    |                                |       |                          |       |
| continuous                         | -0.005 (-0.008, -0.002)        | <0.01 | -0.006 (-0.009, -0.002)  | <0.01 |
| quintile 5                         | -0.21 (-0.33, -0.09)           | <0.01 | -0.25 (-0.37, -0.12)     | <0.01 |
| quintile 4                         | -0.14 (-0.26, -0.03)           |       | -0.16 (-0.28, -0.04)     |       |
| quintile 3                         | -0.07 (-0.19, 0.05)            |       | -0.09 (-0.21, 0.04)      |       |
| quintile 2                         | -0.17 (-0.29, -0.05)           |       | -0.18 (-0.30, -0.05)     |       |
| quintile 1                         | ref                            |       | ref                      |       |
| Leptin, µg/l                       |                                |       |                          |       |
| continuous                         | 0.000 (-0.012, 0.011)          | 0.98  | 0.002 (-0.011, 0.015)    | 0.76  |
| quintile 5                         | -0.30 (-0.79, 0.19)            | 0.84  | -0.25 (-0.79, 0.28)      | 0.91  |
| quintile 4                         | 0.13 (-0.31, 0.58)             |       | 0.24 (-0.24, 0.73)       |       |
| quintile 3                         | -0.21 (-0.68, 0.27)            |       | -0.20 (-0.69, 0.29)      |       |
| quintile 2                         | -0.36 (-0.83, 0.11)            |       | -0.32 (-0.80, 0.16)      |       |
| quintile 1                         | ref                            |       | ref                      |       |
| Cholesterol, mmol/l                |                                |       |                          |       |
| continuous                         | 0.044 (-0.142, 0.230)          | 0.65  | 0.012 (-0.199, 0.222)    | 0.91  |
| quintile 5                         | 1.36 (-6.66, 9.37)             | 0.66  | 0.31 (-8.60, 9.22)       | 0.90  |
| quintile 4                         | 3.97 (-3.65, 11.59)            |       | 2.50 (-5.86, 10.86)      |       |
| quintile 3                         | 4.99 (-3.32, 13.30)            |       | 4.11 (-4.47, 12.69)      |       |
| quintile 2                         | 2.80 (-5.18, 10.78)            |       | 1.52 (-6.69, 9.72)       |       |
| quintile 1                         | ref                            |       | ref                      |       |
| Triglycerides, mmol/l <sup>a</sup> |                                |       |                          |       |
| continuous                         | 0.000 (0.000, 0.000)           | 0.88  | 0.000 (0.000, 0.000)     | 0.63  |
| quintile 5                         | 0.00 (-0.13, 0.12)             | 0.92  | -0.03 (-0.17, 0.11)      | 0.76  |
| quintile 4                         | 0.01 (-0.10, 0.13)             |       | 0.00 (-0.12, 0.13)       |       |
| quintile 3                         | 0.10 (-0.03, 0.23)             |       | 0.09 (-0.03, 0.22)       |       |
| quintile 2                         | -0.01 (-0.14, 0.11)            |       | -0.01 (-0.14, 0.11)      |       |

|                                   |                        |      |                         |      |
|-----------------------------------|------------------------|------|-------------------------|------|
| quintile 1                        | ref                    |      | ref                     |      |
| HDL, mmol/l                       |                        |      |                         |      |
| continuous                        | 0.012 (-0.039, 0.063)  | 0.65 | 0.020 (-0.038, 0.078)   | 0.50 |
| quintile 5                        | 0.72 (-1.49, 2.94)     | 0.39 | 1.32 (-1.14, 3.79)      | 0.24 |
| quintile 4                        | 1.75 (-0.38, 3.88)     |      | 2.08 (-0.23, 4.39)      |      |
| quintile 3                        | 0.29 (-2.00, 2.58)     |      | 0.70 (-1.69, 3.08)      |      |
| quintile 2                        | 1.11 (-1.02, 3.24)     |      | 1.30 (-0.88, 3.47)      |      |
| quintile 1                        | ref                    |      | ref                     |      |
| LDL, mmol/l                       |                        |      |                         |      |
| continuous                        | 0.014 (-0.164, 0.191)  | 0.88 | 0.007 (-0.192, 0.207)   | 0.94 |
| quintile 5                        | 0.35 (-7.30, 8.01)     | 0.84 | 0.19 (-8.20, 8.58)      | 0.85 |
| quintile 4                        | 1.54 (-5.85, 8.93)     |      | 1.00 (-7.02, 9.01)      |      |
| quintile 3                        | 4.61 (-3.23, 12.44)    |      | 3.97 (-4.06, 11.99)     |      |
| quintile 2                        | 0.19 (-7.43, 7.82)     |      | -0.83 (-8.59, 6.94)     |      |
| quintile 1                        | ref                    |      | ref                     |      |
| TGs:HDL ratio <sup>a</sup>        |                        |      |                         |      |
| continuous                        | 0.000 (0.000, 0.000)   | 0.14 | 0.000 (0.000, 0.000)    | 0.03 |
| quintile 5                        | -0.004 (-0.009, 0.001) | 0.09 | -0.007 (-0.012, -0.002) | 0.01 |
| quintile 4                        | -0.004 (-0.009, 0.001) |      | -0.006 (-0.011, -0.001) |      |
| quintile 3                        | -0.001 (-0.006, 0.004) |      | -0.003 (-0.008, 0.002)  |      |
| quintile 2                        | -0.004 (-0.008, 0.001) |      | -0.004 (-0.009, 0.001)  |      |
| quintile 1                        | ref                    |      | ref                     |      |
| %Fat mass                         |                        |      |                         |      |
| continuous                        | 0.035 (-0.017, 0.088)  | 0.19 | 0.029 (-0.028, 0.085)   | 0.32 |
| quintile 5                        | 1.79 (-0.43, 4.01)     | 0.20 | 1.33 (-1.01, 3.67)      | 0.41 |
| quintile 4                        | 1.04 (-1.17, 3.25)     |      | 0.78 (-1.45, 3.02)      |      |
| quintile 3                        | 0.96 (-1.31, 3.23)     |      | 0.18 (-2.04, 2.41)      |      |
| quintile 2                        | 1.52 (-0.74, 3.78)     |      | 1.35 (-0.81, 3.51)      |      |
| quintile 1                        | ref                    |      | ref                     |      |
| Fat mass, kg <sup>a</sup>         |                        |      |                         |      |
| continuous                        | 0.001 (-0.002, 0.005)  | 0.48 | 0.001 (-0.003, 0.005)   | 0.70 |
| quintile 5                        | 0.10 (-0.05, 0.25)     | 0.36 | 0.08 (-0.08, 0.24)      | 0.54 |
| quintile 4                        | 0.08 (-0.07, 0.22)     |      | 0.06 (-0.09, 0.21)      |      |
| quintile 3                        | 0.06 (-0.10, 0.21)     |      | 0.03 (-0.12, 0.18)      |      |
| quintile 2                        | 0.13 (-0.02, 0.28)     |      | 0.11 (-0.03, 0.26)      |      |
| quintile 1                        | ref                    |      | ref                     |      |
| BMI z-score                       |                        |      |                         |      |
| continuous                        | -0.007 (-0.016, 0.001) | 0.08 | -0.002 (-0.010, 0.007)  | 0.68 |
| quintile 5                        | -0.23 (-0.58, 0.13)    | 0.12 | -0.01 (-0.36, 0.35)     | 0.89 |
| quintile 4                        | -0.20 (-0.54, 0.15)    |      | 0.00 (-0.33, 0.34)      |      |
| quintile 3                        | 0.08 (-0.28, 0.43)     |      | 0.19 (-0.15, 0.52)      |      |
| quintile 2                        | -0.05 (-0.41, 0.31)    |      | 0.02 (-0.31, 0.35)      |      |
| quintile 1                        | ref                    |      | ref                     |      |
| Sum of skinfolds, mm <sup>a</sup> |                        |      |                         |      |
| continuous                        | -0.001 (-0.003, 0.002) | 0.65 | 0.000 (-0.003, 0.002)   | 0.89 |
| quintile 5                        | -0.015 (-0.107, 0.076) | 0.53 | -0.003 (-0.099, 0.093)  | 0.74 |
| quintile 4                        | -0.026 (-0.116, 0.065) |      | -0.010 (-0.101, 0.082)  |      |
| quintile 3                        | 0.071 (-0.021, 0.164)  |      | 0.088 (-0.002, 0.179)   |      |
| quintile 2                        | 0.003 (-0.090, 0.095)  |      | 0.010 (-0.079, 0.099)   |      |
| quintile 1                        | ref                    |      | ref                     |      |

Abbreviations: GA, gestational age; HOMA-IR, Homeostatic Model Assessment of Insulin Resistance; HDL, high-density lipoprotein; LDL, low-density lipoprotein; TGs, Triglycerides; BMI, body mass index; cir., circumference

Bolded values indicate P<0.05

Model 1 adjusts for average GA at diet recall throughout pregnancy

Model 2 (confounders): GA at diet recall, maternal race/ethnicity, age, education, prepregnancy BMI, maternal smoking habits, physical activity; and child's age

<sup>a</sup> Estimates represent geometric means; P value derived from models where outcomes were log-transformed due to non-normal distributions

**ESM Table 5.** Association of maternal Health Eating Index (HEI) score (continuous and quintiles) during pregnancy and childhood biomarkers of glucose homeostasis, the adipoinular axis, lipids, and body composition among girls (N=365).

| HEI score                                | MODEL 1<br>(GA at diet recall) |      | MODEL 2<br>(Confounders) |      |
|------------------------------------------|--------------------------------|------|--------------------------|------|
|                                          | BETA CI                        | P    | BETA CI                  | P    |
| <b>Glucose, mmol/l</b>                   |                                |      |                          |      |
| continuous                               | -0.002 (-0.005, 0.002)         | 0.32 | -0.001 (-0.004, 0.003)   | 0.71 |
| quintile 5                               | -0.05 (-0.19, 0.08)            | 0.52 | -0.01 (-0.15, 0.14)      | 0.97 |
| quintile 4                               | 0.08 (-0.05, 0.22)             |      | 0.10 (-0.04, 0.24)       |      |
| quintile 3                               | 0.04 (-0.10, 0.17)             |      | 0.02 (-0.12, 0.17)       |      |
| quintile 2                               | 0.07 (-0.06, 0.20)             |      | 0.09 (-0.04, 0.21)       |      |
| quintile 1                               | ref                            |      | ref                      |      |
| <b>Insulin, pmol/l<sup>a</sup></b>       |                                |      |                          |      |
| continuous                               | -0.006 (-0.010, -0.002)        | 0.01 | -0.004 (-0.009, 0.001)   | 0.11 |
| quintile 5                               | -0.18 (-0.36, 0.01)            | 0.02 | -0.08 (-0.27, 0.12)      | 0.27 |
| quintile 4                               | -0.09 (-0.27, 0.10)            |      | -0.02 (-0.21, 0.17)      |      |
| quintile 3                               | 0.02 (-0.17, 0.20)             |      | 0.06 (-0.13, 0.25)       |      |
| quintile 2                               | 0.05 (-0.12, 0.22)             |      | 0.07 (-0.10, 0.24)       |      |
| quintile 1                               | ref                            |      | ref                      |      |
| <b>One/insulin, pmol/l<sup>a</sup></b>   |                                |      |                          |      |
| continuous                               | 0.006 (0.002, 0.010)           | 0.01 | 0.004 (-0.001, 0.009)    | 0.11 |
| quintile 5                               | 0.18 (-0.01, 0.36)             | 0.02 | 0.08 (-0.12, 0.27)       | 0.27 |
| quintile 4                               | 0.09 (-0.10, 0.27)             |      | 0.02 (-0.17, 0.21)       |      |
| quintile 3                               | -0.02 (-0.20, 0.17)            |      | -0.06 (-0.25, 0.13)      |      |
| quintile 2                               | -0.05 (-0.22, 0.12)            |      | -0.07 (-0.24, 0.10)      |      |
| quintile 1                               | ref                            |      | ref                      |      |
| <b>HOMA-IR, %<sup>a</sup></b>            |                                |      |                          |      |
| continuous                               | -0.006 (-0.011, -0.001)        | 0.01 | -0.004 (-0.009, 0.001)   | 0.13 |
| quintile 5                               | -0.18 (-0.38, 0.01)            | 0.04 | -0.09 (-0.30, 0.12)      | 0.29 |
| quintile 4                               | -0.04 (-0.23, 0.15)            |      | 0.03 (-0.17, 0.23)       |      |
| quintile 3                               | 0.05 (-0.14, 0.25)             |      | 0.09 (-0.11, 0.29)       |      |
| quintile 2                               | 0.07 (-0.11, 0.25)             |      | 0.10 (-0.08, 0.28)       |      |
| quintile 1                               | ref                            |      | ref                      |      |
| <b>Adiponectin, ug/ml<sup>a</sup></b>    |                                |      |                          |      |
| continuous                               | 0.002 (-0.002, 0.005)          | 0.38 | 0.001 (-0.003, 0.005)    | 0.67 |
| quintile 5                               | 0.09 (-0.05, 0.24)             | 0.28 | 0.07 (-0.09, 0.24)       | 0.53 |
| quintile 4                               | 0.07 (-0.08, 0.22)             |      | 0.03 (-0.13, 0.20)       |      |
| quintile 3                               | 0.04 (-0.10, 0.19)             |      | 0.02 (-0.14, 0.19)       |      |
| quintile 2                               | 0.09 (-0.06, 0.24)             |      | 0.07 (-0.09, 0.23)       |      |
| quintile 1                               | ref                            |      | ref                      |      |
| <b>Leptin, ug/l</b>                      |                                |      |                          |      |
| continuous                               | 0.002 (-0.019, 0.022)          | 0.85 | 0.005 (-0.017, 0.028)    | 0.64 |
| quintile 5                               | 0.12 (-0.73, 0.96)             | 0.96 | 0.26 (-0.66, 1.18)       | 0.75 |
| quintile 4                               | 0.24 (-0.59, 1.07)             |      | 0.24 (-0.62, 1.10)       |      |
| quintile 3                               | 0.01 (-0.85, 0.86)             |      | -0.08 (-0.95, 0.80)      |      |
| quintile 2                               | 0.49 (-0.30, 1.27)             |      | 0.49 (-0.30, 1.29)       |      |
| quintile 1                               | ref                            |      | ref                      |      |
| <b>Cholesterol, mmol/l</b>               |                                |      |                          |      |
| continuous                               | 0.136 (-0.073, 0.344)          | 0.20 | 0.116 (-0.109, 0.340)    | 0.31 |
| quintile 5                               | 4.27 (-4.23, 12.78)            | 0.14 | 3.59 (-5.45, 12.62)      | 0.27 |
| quintile 4                               | 3.99 (-4.66, 12.64)            |      | 3.11 (-5.73, 11.94)      |      |
| quintile 3                               | 1.60 (-7.11, 10.32)            |      | 2.62 (-6.25, 11.49)      |      |
| quintile 2                               | -1.80 (-9.87, 6.27)            |      | -1.06 (-9.19, 7.08)      |      |
| quintile 1                               | ref                            |      | ref                      |      |
| <b>Triglycerides, mmol/l<sup>a</sup></b> |                                |      |                          |      |
| continuous                               | 0.000 (0.000, 0.000)           | 1.00 | 0.000 (0.000, 0.000)     | 0.56 |
| quintile 5                               | 0.02 (-0.10, 0.14)             | 0.68 | -0.01 (-0.14, 0.12)      | 0.86 |

|                                   |                        |      |                        |      |
|-----------------------------------|------------------------|------|------------------------|------|
| quintile 4                        | 0.06 (-0.06, 0.18)     |      | 0.03 (-0.10, 0.16)     |      |
| quintile 3                        | 0.08 (-0.05, 0.20)     |      | 0.07 (-0.06, 0.20)     |      |
| quintile 2                        | 0.04 (-0.08, 0.15)     |      | 0.03 (-0.09, 0.14)     |      |
| quintile 1                        | ref                    |      | ref                    |      |
| HDL, mmol/l                       |                        |      |                        |      |
| continuous                        | -0.027 (-0.091, 0.038) | 0.42 | -0.008 (-0.078, 0.062) | 0.83 |
| quintile 5                        | -0.48 (-3.08, 2.13)    | 0.74 | 0.17 (-2.66, 3.00)     | 0.84 |
| quintile 4                        | 0.45 (-2.27, 3.17)     |      | 0.74 (-2.04, 3.53)     |      |
| quintile 3                        | -1.45 (-4.09, 1.20)    |      | -0.71 (-3.43, 2.01)    |      |
| quintile 2                        | 0.38 (-2.09, 2.86)     |      | 0.45 (-2.05, 2.94)     |      |
| quintile 1                        | ref                    |      | ref                    |      |
| LDL, mmol/l                       |                        |      |                        |      |
| continuous                        | 0.212 (0.038, 0.386)   | 0.02 | 0.159 (-0.028, 0.345)  | 0.09 |
| quintile 5                        | 7.18 (0.03, 14.33)     | 0.01 | 5.47 (-2.09, 13.03)    | 0.09 |
| quintile 4                        | 5.20 (-1.91, 12.31)    |      | 3.94 (-3.37, 11.24)    |      |
| quintile 3                        | 2.38 (-4.86, 9.62)     |      | 2.45 (-4.92, 9.82)     |      |
| quintile 2                        | -0.06 (-6.73, 6.61)    |      | 0.47 (-6.26, 7.19)     |      |
| quintile 1                        | ref                    |      | ref                    |      |
| TGs:HDL ratio <sup>a</sup>        |                        |      |                        |      |
| continuous                        | 0.000 (0.000, 0.000)   | 0.53 | 0.000 (0.000, 0.000)   | 0.93 |
| quintile 5                        | 0.001 (-0.004, 0.006)  | 0.67 | -0.001 (-0.006, 0.005) | 0.76 |
| quintile 4                        | 0.000 (-0.005, 0.006)  |      | -0.001 (-0.007, 0.005) |      |
| quintile 3                        | 0.005 (-0.001, 0.010)  |      | 0.004 (-0.002, 0.009)  |      |
| quintile 2                        | 0.000 (-0.005, 0.005)  |      | 0.000 (-0.005, 0.005)  |      |
| quintile 1                        | ref                    |      | ref                    |      |
| %Fat mass                         |                        |      |                        |      |
| continuous                        | -0.033 (-0.089, 0.022) | 0.24 | -0.022 (-0.078, 0.033) | 0.43 |
| quintile 5                        | -0.86 (-3.15, 1.43)    | 0.43 | -0.03 (-2.29, 2.23)    | 0.81 |
| quintile 4                        | 0.35 (-1.99, 2.69)     |      | 0.47 (-1.76, 2.70)     |      |
| quintile 3                        | 1.13 (-1.19, 3.45)     |      | 0.90 (-1.31, 3.11)     |      |
| quintile 2                        | 0.76 (-1.49, 3.01)     |      | 1.03 (-1.04, 3.10)     |      |
| quintile 1                        | ref                    |      | ref                    |      |
| Fat mass, kg <sup>a</sup>         |                        |      |                        |      |
| continuous                        | -0.001 (-0.005, 0.003) | 0.59 | 0.000 (-0.005, 0.004)  | 0.92 |
| quintile 5                        | -0.03 (-0.20, 0.15)    | 0.79 | 0.03 (-0.15, 0.21)     | 0.85 |
| quintile 4                        | 0.07 (-0.11, 0.25)     |      | 0.08 (-0.10, 0.26)     |      |
| quintile 3                        | 0.05 (-0.13, 0.22)     |      | 0.04 (-0.13, 0.22)     |      |
| quintile 2                        | 0.07 (-0.10, 0.24)     |      | 0.10 (-0.06, 0.27)     |      |
| quintile 1                        | ref                    |      | ref                    |      |
| BMI z-score                       |                        |      |                        |      |
| continuous                        | -0.002 (-0.009, 0.005) | 0.60 | 0.001 (-0.007, 0.008)  | 0.89 |
| quintile 5                        | -0.05 (-0.34, 0.25)    | 0.96 | 0.09 (-0.21, 0.39)     | 0.56 |
| quintile 4                        | 0.18 (-0.12, 0.47)     |      | 0.18 (-0.11, 0.48)     |      |
| quintile 3                        | 0.04 (-0.25, 0.33)     |      | 0.06 (-0.22, 0.34)     |      |
| quintile 2                        | 0.10 (-0.19, 0.39)     |      | 0.18 (-0.10, 0.45)     |      |
| quintile 1                        | ref                    |      | ref                    |      |
| Sum of skinfolds, mm <sup>a</sup> |                        |      |                        |      |
| continuous                        | 0.000 (-0.002, 0.002)  | 0.83 | 0.001 (-0.001, 0.003)  | 0.52 |
| quintile 5                        | 0.041 (-0.043, 0.125)  | 0.49 | 0.072 (-0.017, 0.161)  | 0.26 |
| quintile 4                        | 0.054 (-0.031, 0.140)  |      | 0.057 (-0.030, 0.144)  |      |
| quintile 3                        | 0.040 (-0.044, 0.123)  |      | 0.046 (-0.039, 0.131)  |      |
| quintile 2                        | 0.078 (-0.005, 0.161)  |      | 0.094 (0.012, 0.175)   |      |
| quintile 1                        | ref                    |      | ref                    |      |

Abbreviations: GA, gestational age; HOMA-IR, Homeostatic Model Assessment of Insulin Resistance; HDL, high-density lipoprotein; LDL, low-density lipoprotein; TGs, Triglycerides; BMI, body mass index; cir., circumference

Bolded values indicate P<0.05

Model 1 adjusts for average GA at diet recall throughout pregnancy

Model 2 (confounders): GA at diet recall, maternal race/ethnicity, age, education, prepregnancy BMI, maternal smoking habits, physical activity; and child's age

a Estimates represent geometric means; P value derived from models where outcomes were log-transformed due to non-normal distributions



**ESM Table 6. Association of maternal Health Eating Index score >57 vs. ≤57 in early (<27 gestational weeks), late pregnancy (≥27 gestational weeks pregnancy), and consistently >57 at both time-points with childhood biomarkers of glucose homeostasis, the adipoinular axis, lipids, and body composition**

| HEI score >57 vs. ≤57              | Early Pregnancy <27 gestational weeks |      |                         |      | Late pregnancy ≥27 gestational weeks |      |                        |      | HEI score consistently >57 in early and late pregnancy |      |                         |      |
|------------------------------------|---------------------------------------|------|-------------------------|------|--------------------------------------|------|------------------------|------|--------------------------------------------------------|------|-------------------------|------|
|                                    | UNADJUSTED                            |      | ADJUSTED                |      | UNADJUSTED                           |      | ADJUSTED               |      | UNADJUSTED                                             |      | ADJUSTED                |      |
|                                    | BETA CI                               | P    | BETA CI                 | P    | BETA CI                              | P    | BETA CI                | P    | BETA CI                                                | P    | BETA CI                 | P    |
| <b>Among boys (N=220)</b>          |                                       |      |                         |      |                                      |      |                        |      |                                                        |      |                         |      |
| Glucose, mmol/l                    | -0.08<br>(-0.20, 0.05)                | 0.24 | -0.02<br>(-0.15, 0.11)  | 0.76 | -0.07<br>(-0.21, 0.07)               | 0.31 | -0.05<br>(-0.19, 0.08) | 0.44 | -0.06<br>(-0.18, 0.06)                                 | 0.32 | -0.02<br>(-0.14, 0.10)  | 0.71 |
| Insulin, pmol/l <sup>a</sup>       | -0.15<br>(-0.31, 0.01)                | 0.07 | -0.10<br>(-0.28, 0.07)  | 0.25 | -0.13<br>(-0.31, 0.05)               | 0.14 | -0.09<br>(-0.27, 0.09) | 0.33 | -0.13<br>(-0.28, 0.03)                                 | 0.11 | -0.08<br>(-0.25, 0.08)  | 0.31 |
| One/insulin, pmol/l <sup>a</sup>   | 0.15<br>(-0.01, 0.31)                 | 0.07 | 0.10<br>(-0.07, 0.28)   | 0.25 | 0.13<br>(-0.05, 0.31)                | 0.14 | 0.09<br>(-0.09, 0.27)  | 0.33 | 0.13<br>(-0.03, 0.28)                                  | 0.11 | 0.08<br>(-0.08, 0.25)   | 0.31 |
| HOMA-IR, % <sup>a</sup>            | -0.18<br>(-0.35, -0.01)               | 0.04 | -0.11<br>(-0.29, 0.07)  | 0.23 | -0.14<br>(-0.32, 0.04)               | 0.13 | -0.09<br>(-0.27, 0.10) | 0.37 | -0.14<br>(-0.30, 0.02)                                 | 0.08 | -0.08<br>(-0.25, 0.08)  | 0.32 |
| Adiponectin, ug/ml <sup>a</sup>    | -0.08<br>(-0.19, 0.03)                | 0.15 | -0.10<br>(-0.21, 0.02)  | 0.10 | -0.12<br>(-0.24, 0.01)               | 0.08 | -0.11<br>(-0.24, 0.02) | 0.11 | -0.07<br>(-0.17, 0.03)                                 | 0.18 | -0.08<br>(-0.19, 0.03)  | 0.14 |
| Leptin, µg/l                       | 0.02<br>(-0.41, 0.46)                 | 0.92 | 0.00<br>(-0.45, 0.44)   | 0.98 | -0.05<br>(-0.53, 0.43)               | 0.84 | 0.06<br>(-0.42, 0.55)  | 0.79 | -0.06<br>(-0.49, 0.37)                                 | 0.78 | -0.08<br>(-0.51, 0.35)  | 0.72 |
| Cholesterol, mmol/l                | -4.60<br>(-11.86, 2.65)               | 0.21 | -6.07<br>(-14.03, 1.89) | 0.13 | -0.22<br>(-8.08, 7.65)               | 0.96 | -1.16<br>(-9.45, 7.14) | 0.78 | -2.79<br>(-9.64, 4.06)                                 | 0.42 | -3.78<br>(-11.17, 3.61) | 0.32 |
| Triglycerides, mmol/l <sup>a</sup> | 0.02<br>(-0.09, 0.13)                 | 0.73 | -0.03<br>(-0.15, 0.09)  | 0.61 | 0.09<br>(-0.02, 0.21)                | 0.12 | 0.08<br>(-0.04, 0.20)  | 0.21 | 0.05<br>(-0.05, 0.15)                                  | 0.36 | 0.02<br>(-0.09, 0.13)   | 0.74 |
| HDL, mmol/l                        | -1.56<br>(-3.46, 0.34)                | 0.11 | -1.10<br>(-3.16, 0.96)  | 0.30 | -0.95<br>(-2.99, 1.09)               | 0.36 | -1.25<br>(-3.35, 0.85) | 0.24 | -0.94<br>(-2.74, 0.87)                                 | 0.31 | -0.67<br>(-2.56, 1.23)  | 0.49 |
| LDL, mmol/l                        | -4.28<br>(-11.44, 2.88)               | 0.24 | -4.45<br>(-12.23, 3.32) | 0.26 | -0.61<br>(-8.35, 7.13)               | 0.88 | -0.16<br>(-8.31, 7.99) | 0.97 | -2.83<br>(-9.57, 3.90)                                 | 0.41 | -2.67<br>(-9.89, 4.54)  | 0.47 |
| TGs:HDL ratio <sup>a</sup>         | 0.00<br>(0.00, 0.01)                  | 0.24 | 0.00<br>(0.00, 0.01)    | 0.68 | 0.00<br>(0.00, 0.01)                 | 0.33 | 0.00<br>(0.00, 0.01)   | 0.31 | 0.00<br>(0.00, 0.01)                                   | 0.29 | 0.00<br>(0.00, 0.01)    | 0.55 |
| %Fat mass                          | 0.88<br>(-0.88, 2.65)                 | 0.33 | 0.46<br>(-1.30, 2.23)   | 0.61 | 0.82<br>(-1.04, 2.69)                | 0.39 | 0.10<br>(-1.81, 2.02)  | 0.92 | 0.97<br>(-0.71, 2.65)                                  | 0.26 | 0.45<br>(-1.27, 2.16)   | 0.61 |
| Fat mass, kg <sup>a</sup>          | 0.01<br>(-0.10, 0.12)                 | 0.85 | 0.01<br>(-0.11, 0.12)   | 0.91 | 0.07<br>(-0.05, 0.19)                | 0.27 | 0.04<br>(-0.08, 0.17)  | 0.49 | 0.05<br>(-0.06, 0.15)                                  | 0.41 | 0.03<br>(-0.08, 0.14)   | 0.58 |
| BMI z-score                        | -0.28<br>(-0.56, 0.01)                | 0.06 | -0.16<br>(-0.44, 0.12)  | 0.27 | 0.03<br>(-0.28, 0.33)                | 0.85 | 0.17<br>(-0.13, 0.47)  | 0.26 | -0.09<br>(-0.36, 0.18)                                 | 0.52 | 0.03<br>(-0.24, 0.29)   | 0.84 |
| Sum of skinfolds, mm <sup>a</sup>  | -0.02<br>(-0.10, 0.06)                | 0.6  | -0.01<br>(-0.09, 0.07)  | 0.78 | 0.03<br>(-0.06, 0.11)                | 0.56 | 0.04<br>(-0.05, 0.12)  | 0.41 | 0.01<br>(-0.06, 0.09)                                  | 0.76 | 0.02<br>(-0.06, 0.10)   | 0.61 |
| <b>Among girls (N=204)</b>         |                                       |      |                         |      |                                      |      |                        |      |                                                        |      |                         |      |
| Glucose, mmol/l                    | -0.08<br>(-0.20, 0.05)                | 0.22 | -0.01<br>(-0.14, 0.11)  | 0.83 | -0.07<br>(-0.19, 0.06)               | 0.3  | -0.04<br>(-0.17, 0.09) | 0.57 | -0.11<br>(-0.23, 0.00)                                 | 0.05 | -0.08<br>(-0.19, 0.04)  | 0.21 |
| Insulin, pmol/l <sup>a</sup>       | -0.07<br>(-0.22, 0.08)                | 0.35 | -0.02<br>(-0.18, 0.13)  | 0.79 | 0.01<br>(-0.14, 0.16)                | 0.88 | 0.07<br>(-0.09, 0.23)  | 0.4  | -0.05<br>(-0.19, 0.10)                                 | 0.52 | -0.01<br>(-0.16, 0.14)  | 0.91 |

|                                    |                        |      |                        |      |                        |      |                         |      |                         |      |                        |      |
|------------------------------------|------------------------|------|------------------------|------|------------------------|------|-------------------------|------|-------------------------|------|------------------------|------|
| One/insulin, pmol/l <sup>a</sup>   | 0.07<br>(-0.08, 0.22)  | 0.35 | 0.02<br>(-0.13, 0.18)  | 0.79 | -0.01<br>(-0.16, 0.14) | 0.88 | -0.07<br>(-0.23, 0.09)  | 0.4  | 0.05<br>(-0.10, 0.19)   | 0.52 | 0.01<br>(-0.14, 0.16)  | 0.91 |
| HOMA-IR, % <sup>a</sup>            | -0.05<br>(-0.21, 0.10) | 0.5  | -0.01<br>(-0.17, 0.15) | 0.87 | 0.00<br>(-0.16, 0.16)  | 0.97 | 0.04<br>(-0.13, 0.21)   | 0.63 | -0.07<br>(-0.22, 0.08)  | 0.35 | -0.04<br>(-0.19, 0.11) | 0.60 |
| Adiponectin, ug/ml <sup>a</sup>    | 0.07<br>(-0.06, 0.20)  | 0.31 | 0.10<br>(-0.05, 0.26)  | 0.20 | 0.01<br>(-0.12, 0.14)  | 0.9  | 0.00<br>(-0.16, 0.16)   | 0.96 | 0.03<br>(-0.09, 0.16)   | 0.58 | 0.06<br>(-0.09, 0.21)  | 0.47 |
| Leptin, µg/l                       | 0.02<br>(-0.80, 0.84)  | 0.96 | -0.32<br>(-1.18, 0.53) | 0.46 | 0.39<br>(-0.46, 1.23)  | 0.37 | 0.19<br>(-0.69, 1.08)   | 0.67 | -0.04<br>(-0.80, 0.72)  | 0.92 | -0.47<br>(-1.30, 0.35) | 0.26 |
| Cholesterol, mmol/l                | 2.12<br>(-5.76, 10.01) | 0.6  | -0.77<br>(-9.06, 7.51) | 0.86 | 1.58<br>(-6.47, 9.64)  | 0.7  | -1.39<br>(-10.18, 7.39) | 0.76 | 4.45<br>(-2.85, 11.76)  | 0.23 | 1.80<br>(-6.11, 9.71)  | 0.66 |
| Triglycerides, mmol/l <sup>a</sup> | 0.07<br>(-0.05, 0.18)  | 0.26 | 0.06<br>(-0.06, 0.19)  | 0.31 | -0.03<br>(-0.15, 0.09) | 0.64 | -0.06<br>(-0.19, 0.08)  | 0.4  | 0.05<br>(-0.06, 0.15)   | 0.40 | 0.03<br>(-0.09, 0.15)  | 0.63 |
| HDL, mmol/l                        | 0.07<br>(-2.36, 2.50)  | 0.96 | 0.37<br>(-2.29, 3.03)  | 0.78 | -0.57<br>(-3.00, 1.86) | 0.64 | -0.66<br>(-3.39, 2.06)  | 0.63 | -0.27<br>(-2.54, 2.00)  | 0.82 | -0.37<br>(-2.93, 2.19) | 0.78 |
| LDL, mmol/l                        | 2.24<br>(-3.97, 8.46)  | 0.48 | -0.33<br>(-6.86, 6.20) | 0.92 | 1.91<br>(-4.44, 8.26)  | 0.56 | 0.56<br>(-6.34, 7.46)   | 0.87 | 3.89<br>(-1.90, 9.68)   | 0.19 | 2.10<br>(-4.16, 8.35)  | 0.51 |
| TGs:HDL ratio <sup>a</sup>         | 0.00<br>(0.00, 0.01)   | 0.6  | 0.00<br>(0.00, 0.01)   | 0.68 | 0.00<br>(0.00, 0.01)   | 0.78 | 0.00<br>(0.00, 0.01)    | 0.74 | 0.00<br>(0.00, 0.01)    | 0.55 | 0.00<br>(0.00, 0.01)   | 0.51 |
| %Fat mass                          | -1.91<br>(-4.14, 0.32) | 0.09 | -1.51<br>(-3.60, 0.59) | 0.16 | -1.66<br>(-3.81, 0.49) | 0.13 | -0.11<br>(-2.20, 1.99)  | 0.92 | -2.04<br>(-4.04, -0.04) | 0.05 | -1.27<br>(-3.19, 0.64) | 0.19 |
| Fat mass, kg <sup>a</sup>          | -0.11<br>(-0.25, 0.03) | 0.12 | -0.08<br>(-0.22, 0.05) | 0.23 | -0.09<br>(-0.22, 0.05) | 0.21 | 0.01<br>(-0.13, 0.14)   | 0.94 | -0.12<br>(-0.25, 0.01)  | 0.06 | -0.07<br>(-0.19, 0.06) | 0.30 |
| BMI z-score                        | -0.08<br>(-0.36, 0.19) | 0.55 | -0.04<br>(-0.30, 0.22) | 0.75 | -0.14<br>(-0.41, 0.12) | 0.29 | -0.07<br>(-0.34, 0.19)  | 0.59 | -0.09<br>(-0.33, 0.16)  | 0.50 | 0.01<br>(-0.24, 0.25)  | 0.97 |
| Sum of skinfolds, mm <sup>a</sup>  | -0.05<br>(-0.12, 0.03) | 0.2  | -0.06<br>(-0.14, 0.01) | 0.11 | 0.02<br>(-0.06, 0.09)  | 0.63 | 0.04<br>(-0.04, 0.12)   | 0.33 | -0.03<br>(-0.09, 0.04)  | 0.47 | -0.03<br>(-0.10, 0.04) | 0.47 |

Abbreviations: HOMA-IR, Homeostatic Model Assessment of Insulin Resistance; HDL, high-density lipoprotein; LDL, low-density lipoprotein; TGs, Triglycerides; BMI, body mass index; cir., circumference

Adjusted model: maternal race/ethnicity, age, education, prepregnancy BMI, maternal smoking habits; and child's age

<sup>a</sup> Estimates represent geometric means; P value derived from models where outcomes were log-transformed due to non-normal distributions

○ Raw Pvalue  
● Bootstrap Pvalue

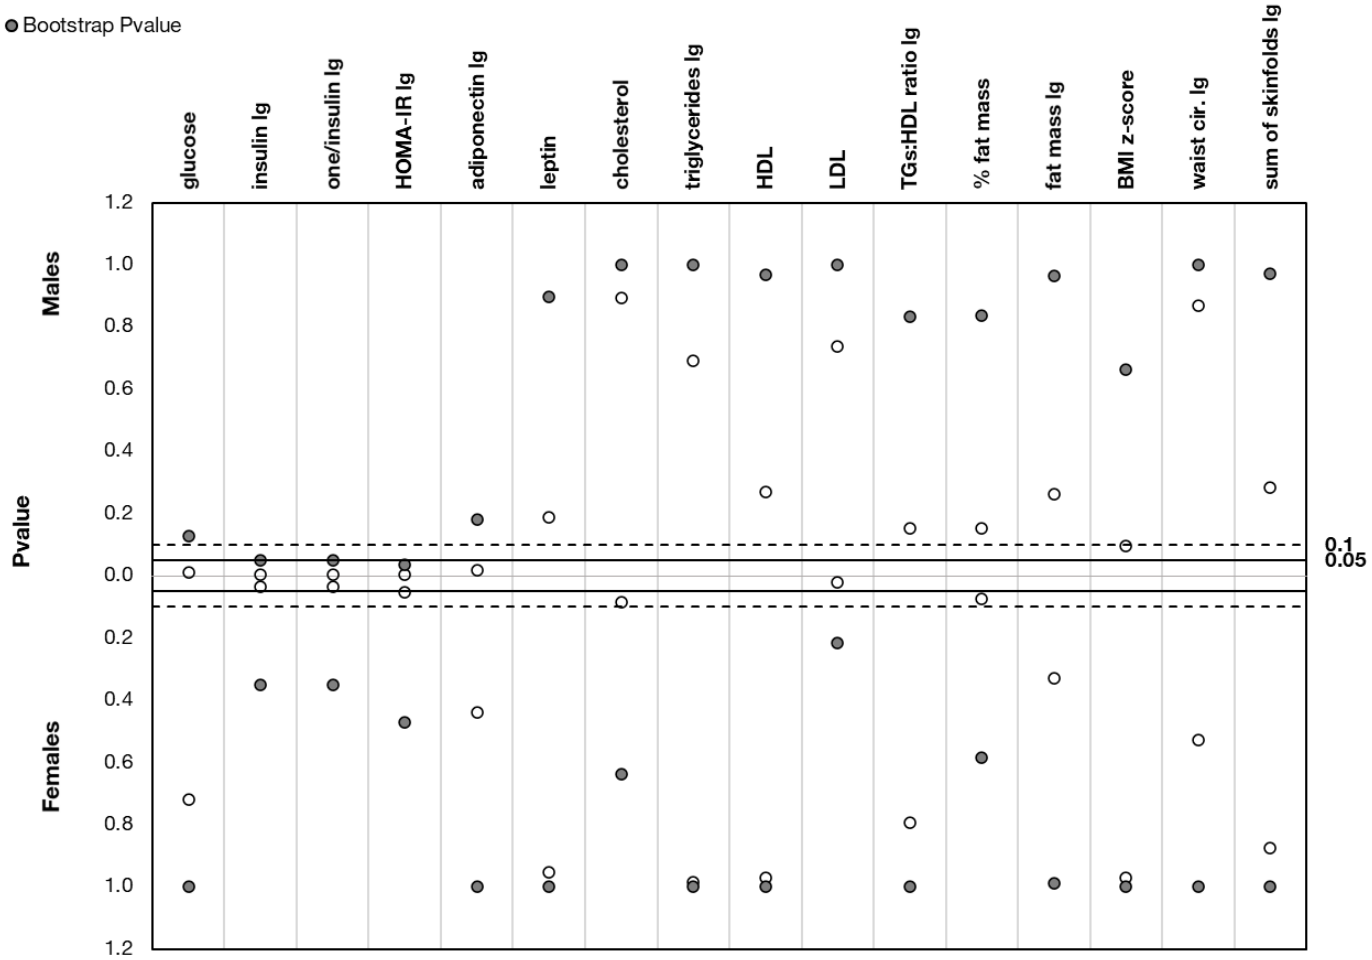

**ESM Figure 1. Bootstrap corrected P-values for the estimates of association between maternal Health Eating Index score >57 vs. ≤57 during pregnancy and childhood biomarkers of glucose homeostasis, the adipoinular axis, lipids, and body composition**

lg: log transformed; Broken line indicates P-value <0.10; Solid line indicates P-value <0.05;



| Girls              | glucose | insulin | one/<br>insulin | HOMA-<br>IR | adipone<br>ctin | leptin | cholest<br>erol | TGs   | HDL   | LDL   | TGs:<br>HDL | % fat<br>mass | fat<br>mass | BMI<br>z-score | SSF   |
|--------------------|---------|---------|-----------------|-------------|-----------------|--------|-----------------|-------|-------|-------|-------------|---------------|-------------|----------------|-------|
| <b>glucose</b>     | 1.00    | 0.46    | -0.46           | 0.56        | -0.01           | 0.02   | -0.06           | 0.06  | -0.05 | -0.14 | -0.07       | 0.08          | 0.14        | 0.21           | 0.24  |
| <b>insulin</b>     |         | 1.00    | -1.00           | 0.99        | -0.07           | -0.09  | -0.09           | 0.10  | 0.06  | -0.16 | -0.06       | 0.14          | 0.16        | 0.18           | 0.17  |
| <b>one/insulin</b> |         |         | 1.00            | -0.99       | 0.07            | 0.09   | 0.09            | -0.10 | -0.06 | 0.16  | 0.06        | -0.14         | -0.16       | -0.18          | -0.17 |
| <b>HOMA-IR</b>     |         |         |                 | 1.00        | -0.06           | -0.12  | -0.11           | 0.10  | 0.05  | -0.19 | -0.07       | 0.14          | 0.17        | 0.18           | 0.19  |
| <b>adiponectin</b> |         |         |                 |             | 1.00            | -0.02  | 0.02            | 0.27  | -0.17 | 0.05  | -0.30       | 0.08          | 0.15        | 0.15           | 0.09  |
| <b>leptin</b>      |         |         |                 |             |                 | 1.00   | -0.06           | -0.01 | -0.23 | 0.04  | -0.05       | 0.15          | 0.17        | 0.28           | 0.28  |
| <b>cholesterol</b> |         |         |                 |             |                 |        | 1.00            | 0.13  | 0.39  | 0.80  | -0.09       | 0.02          | 0.01        | 0.05           | 0.07  |
| <b>TGs</b>         |         |         |                 |             |                 |        |                 | 1.00  | -0.06 | 0.15  | -0.92       | 0.04          | 0.04        | 0.12           | -0.01 |
| <b>HDL</b>         |         |         |                 |             |                 |        |                 |       | 1.00  | 0.03  | 0.41        | -0.11         | -0.08       | 0.01           | 0.01  |
| <b>LDL</b>         |         |         |                 |             |                 |        |                 |       |       | 1.00  | -0.15       | 0.06          | 0.02        | -0.01          | 0.09  |
| <b>TGs:HDL</b>     |         |         |                 |             |                 |        |                 |       |       |       | 1.00        | -0.03         | -0.02       | -0.15          | 0.01  |
| <b>% fat mass</b>  |         |         |                 |             |                 |        |                 |       |       |       |             | 1.00          | 0.91        | 0.40           | 0.40  |
| <b>fat mass</b>    |         |         |                 |             |                 |        |                 |       |       |       |             |               | 1.00        | 0.57           | 0.48  |
| <b>BMI z-score</b> |         |         |                 |             |                 |        |                 |       |       |       |             |               |             | 1.00           | 0.52  |
| <b>SSF</b>         |         |         |                 |             |                 |        |                 |       |       |       |             |               |             |                | 1.00  |

**EMS Figure 2. Spearman correlations between child biomarkers and body composition**

Abbreviations: HOMA-IR, Homeostatic Model Assessment of Insulin Resistance; HDL, high-density lipoprotein; LDL, low-density lipoprotein; TGs, Triglycerides; BMI, body mass index; cir., circumference; SSF, sum of skinfolds

Darker blue indicates stronger positive correlation; Darker red indicate stronger negative correlation
